# Supplementary material
Source: PubMed Central journal article supplement (PMC4054188)
Supplement: JB.01484-14_zjb999093156so1.pdf [file JB.01484-14_zjb999093156so1.pdf]

**Table S1.** Bacterial strains and plasmids used in this work

| Strain or plasmid         | Genotype and/or Relevant characteristics                                                                                                                                     | Source or Reference |
|---------------------------|------------------------------------------------------------------------------------------------------------------------------------------------------------------------------|---------------------|
| <b><i>E. coli</i></b>     |                                                                                                                                                                              |                     |
| DH5 $\alpha$              | <i>recA1 <math>\phi</math>80 lacZ<math>\Delta</math>M15, gyrA96</i>                                                                                                          | Gibco BRL           |
| SU101                     | <i>E. coli</i> JL 1434, <i>lexA71::Tn5</i> (Def) <i>sulA211 <math>\Delta</math>(lacIPOZYA) 169/F<sup>+</sup> lacI<sup>s</sup> lacZ <math>\Delta</math>M15::Tn9</i> (op+/op+) | (10)                |
| BL21/pLys21               | F <sup>-</sup> <i>ompT</i> ( <i>lon</i> ) <i>hdsS<sub>B</sub></i> (F <sub>B</sub> <sup>-</sup> m <sub>B</sub> <sup>-</sup> ) <i>gal dcm</i> ( $\lambda$ DE3)                 | Invitrogen          |
| <b><i>S. entérica</i></b> |                                                                                                                                                                              |                     |
| IMSS-1                    | <i>Salmonella enterica</i> serovar Typhi 9,12, d, Vi; Mexican clinical isolate                                                                                               | (44)                |
| <b>Plasmids</b>           |                                                                                                                                                                              |                     |
| pSR658-A                  | Vector encoding a LexA DBD sequences used for homodimerization studies; Tc <sup>r</sup> <i>oriV</i>                                                                          | (7)                 |
| pLexA-LeuO1-314           | pSR658-A derived plasmid containing the fusion <i>lexA<sub>DBD</sub>-leuO</i> (complete gene)                                                                                | This study          |
| pLexA-LeuO1-309           | pSR658-A derived plasmid containing the fusion <i>lexA<sub>DBD</sub>-leuO</i> with a deletion of fifteen nucleotides at the 3' end of <i>leuO</i>                            | This study          |
| pLexA-LeuO1-304           | pSR658-A derived plasmid containing the fusion <i>lexA<sub>DBD</sub>-leuO</i> with a deletion of thirty nucleotides at the 3' end of <i>leuO</i>                             | This study          |
| pLexA-LeuO1-299           | pSR658-A derived plasmid containing the fusion <i>lexA<sub>DBD</sub>-leuO</i> with a deletion of forty-five nucleotides at the 3' end of <i>leuO</i>                         | This study          |
| pLexA-LeuO1-294           | pSR658-A derived plasmid containing the <i>lexA<sub>DBD</sub>-leuO</i> with a deletion of sixty nucleotides at the 3' end of <i>leuO</i>                                     | This study          |
| pLexA-LeuO1-284           | pSR658-A derived plasmid containing the <i>lexA<sub>DBD</sub>-leuO</i> with a deletion of ninety nucleotides at the 3' end of <i>leuO</i>                                    | This study          |
| pLexA-LeuO1-214           | pSR658-A derived plasmid containing the <i>lexA<sub>DBD</sub>-leuO</i> with a deletion of three hundred nucleotides at the 3' end of <i>leuO</i>                             | This study          |
| pLexA-LeuOL27A            | pSR658-A derived plasmid containing the <i>lexA<sub>DBD</sub>-leuO-L27A</i> (alanine substitution at residue L27 in <i>LeuO</i> ) fusion                                     | This study          |
| pLexA-LeuOL46A            | pSR658-A derived plasmid containing the <i>lexA<sub>DBD</sub>-leuO-L46A</i> (alanine substitution at residue L46 in <i>LeuO</i> ) fusion                                     | This study          |
| pLexA-LeuOS54A            | pSR658-A derived plasmid containing the <i>lexA<sub>DBD</sub>-leuO-S54A</i> (alanine substitution at residue S54 in <i>LeuO</i> ) fusion                                     | This study          |
| pLexA-LeuOL60             | pSR658-A derived plasmid containing the <i>lexA<sub>DBD</sub>-leuO-L60A</i> (alanine substitution at residue L60 in <i>LeuO</i> ) fusion                                     | This study          |
| pLexA-LeuOT79A            | pSR658-A derived plasmid containing the <i>lexA<sub>DBD</sub>-leuO-T79A</i> (alanine substitution at residue T79 in <i>LeuO</i> ) fusion                                     | This study          |
| pLexA-LeuOP139A           | pSR658-A derived plasmid containing the <i>lexA<sub>DBD</sub>-leuO-P139A</i> (alanine substitution at residue P139 in <i>LeuO</i> ) fusion                                   | This study          |
| pLexA-LeuOS310A           | pSR658-A derived plasmid containing the <i>lexA<sub>DBD</sub>-leuO-S310A</i> (alanine substitution at residue S310 in <i>LeuO</i> ) fusion                                   | This study          |
| pLexA-LeuOV311A           | pSR658-A derived plasmid containing the <i>lexA<sub>DBD</sub>-leuO-V311A</i> (alanine substitution at residue V311 in <i>LeuO</i> ) fusion                                   | This study          |
| pLexA-LeuOC312A           | pSR658-A derived plasmid containing the <i>lexA<sub>DBD</sub>-leuO-C312A</i> (alanine substitution at residue C312 in <i>LeuO</i> ) fusion                                   | This study          |
| pLexA-LeuOK313A           | pSR658-A derived plasmid containing the <i>lexA<sub>DBD</sub>-leuO-K313A</i> (alanine substitution at residue K313 in <i>LeuO</i> ) fusion                                   | This study          |
| pLexA-LeuOR314A           | pSR658-A derived plasmid containing the <i>lexA<sub>DBD</sub>-leuO-R314A</i> (alanine substitution at residue R314 in <i>LeuO</i> ) fusion                                   | This study          |
| pFMTrc12                  | pTrc99A modified with replication origin p15A1 <i>lacI ptrc</i> ; Ap <sup>r</sup>                                                                                            | (13)                |
| pFMTrcleuO-50             | pFMTrc12 derived plasmid containing the <i>leuO</i> gene                                                                                                                     | (8)                 |
| pLeuO1-309                | pFMTrcleuO-50 derived containing a deletion of fifteen nucleotides at 3' end of <i>leuO</i>                                                                                  | This study          |
| pLeuO1-304                | pFMTrcleuO-50 derived containing a deletion of thirty nucleotides at 3' end of <i>leuO</i>                                                                                   | This study          |
| pLeuO1-299                | pFMTrcleuO-50 derived containing a deletion of forty-five nucleotides at 3' end of <i>leuO</i>                                                                               | This study          |
| pLeuO1-294                | pFMTrcleuO-50 derived containing a deletion of sixty nucleotides at 3' end of <i>leuO</i>                                                                                    | This study          |
| pLeuO1-284                | pFMTrcleuO-50 derived containing a deletion of ninety nucleotides at 3' end of <i>leuO</i>                                                                                   | This study          |
| pLeuO1-214                | pFMTrcleuO derived containing a deletion of three hundred nucleotides at 3' end of <i>leuO</i>                                                                               | This study          |
| pLeuOL27A                 | pFMTrcleuO-50 derived containing an alanine substitution at residue L27 of <i>LeuO</i>                                                                                       | This study          |
| pLeuOL46A                 | pFMTrcleuO-50 derived containing an alanine substitution at residue L46 of <i>LeuO</i>                                                                                       | This study          |

|                       |                                                                                                                   |            |
|-----------------------|-------------------------------------------------------------------------------------------------------------------|------------|
| pLeuOS54A             | pFMTrcleuO-50 derived containing an alanine substitution at residue S54 of LeuO                                   | This study |
| pLeuOL60A             | pFMTrcleuO-50 derived containing an alanine substitution at residue L60 of LeuO                                   | This study |
| pLeuOT79A             | pFMTrcleuO-50 derived containing an alanine substitution at residue T79 of LeuO                                   | This study |
| pLeuOP139A            | pFMTrcleuO-50 derived containing an alanine substitution at residue P139 of LeuO                                  | This study |
| pLeuOS310A            | pFMTrcleuO-50 derived containing an alanine substitution at residue S310 of LeuO                                  | This study |
| pLeuOV311A            | pFMTrcleuO-50 derived containing alanine substitution at residue V311 of LeuO                                     | This study |
| pLeuOC312A            | pFMTrcleuO-50 derived containing an alanine substitution at residue C312 of LeuO                                  | This study |
| pLeuOK313A            | pFMTrcleuO-50 derived containing an alanine substitution at residue K313 of LeuO                                  | This study |
| pLeuOR314A            | pFMTrcleuO-50 derived containing an alanine substitution at residue R314 of LeuO                                  | This study |
| pMPM-T6Ω              | pBR322 derived, p15A ori, tetracycline resistance, AraC repressor/activator, Ω interposon                         |            |
| pMPMLeuO-His          | pMPM-T6Ω derived plasmid containing full-length <i>leuO</i> gene with a Hisx6 tag under pBAD promoter.            | This study |
| pMPMLeuO1-299         | pMPM-T6Ω derived plasmid containing a deletion of fifteen nucleotides at the 3' end of <i>leuO</i> with Hisx6 tag | This study |
| pMPMLeuO1-284         | pMPM-T6Ω derived plasmid containing a deletion of ninety nucleotides of 3' end of <i>leuO</i> with a Hisx6 tag    | This study |
| pMPMLeuOS54A          | pMPM-T6Ω derived plasmid containing alanine substitution at residue S54 of LeuO with a Hisx6 tag                  | This study |
| pMPMLeuOT79A          | pMPM-T6Ω derived plasmid containing alanine substitution at residue T79 of LeuO with a Hisx6 tag                  | This study |
| pMPMLeuOP139A         | pMPM-T6Ω derived plasmid containing alanine substitution at residue P139 of LeuO with a Hisx6 tag                 | This study |
| pKK232-9 <i>ompS1</i> | pKK232-9 derived containing 706-bp upstream and 60-bp downstream of the <i>ompS1</i> ATG start codon              | (21)       |
| pKK232-9 <i>tpx</i>   | pKK232-9 derived containing 405-bp upstream and 82-bp downstream of the <i>tpx</i> ATG start codon                | (21)       |
| pRO310                | pMC1871-derived plasmid, containing a translational fusion of <i>ompS1</i> to the <i>lacZ</i> reporter gene.      | (42)       |
| PTEPLer1              | pMPM-T3 derived expressing <i>ler</i> fragment from the <i>lac</i> promoter                                       | (4)        |
